# Supplementary material for: Bifunctional and durable MoSe 2 –RuSe 2 heterojunction catalyst for alkaline seawater splitting
Source: Royal Society of Chemistry journal article supplement (doi:10.1039/d5ta09057a), 2026-01-01
Supplement: d5ta09057a1.pdf [file d5ta09057a1.pdf]

## **Supporting Information**

### **Bifunctional and durable MoSe<sub>2</sub>-RuSe<sub>2</sub> heterojunction catalyst for alkaline seawater splitting**

Shengqi Fan, Junhao Fu, Hongming Chen, Mengxiang Liu, Xueyan Zhang\*,

Lijie Luo\* and Yongjun Chen\*

School of Materials Science and Engineering, Hainan University, Haikou 570228, China.

\*Corresponding authors. E-mails: zhangxy147@hainanu.edu.cn (X. Zhang),  
luolijie4567@163.com (L. Luo), chenyltg@163.com (Y. Chen)



## Figure captions

**Figure S1** SEM images of (a) MoSe<sub>2</sub>/NF and (b) RuSe<sub>2</sub>/NF.

**Figure S2** Nitrogen (N<sub>2</sub>) adsorption-desorption isotherms of MoSe<sub>2</sub>-RuSe<sub>2</sub> at 77 K.

**Figure S3** XRD patterns of MoSe<sub>2</sub>-RuSe<sub>2</sub>.

**Figure S4** XPS survey spectrum of MoSe<sub>2</sub>-RuSe<sub>2</sub>/NF.

**Figure S5** High-resolution XPS spectra of Ni 2p in MoSe<sub>2</sub>/NF, RuSe<sub>2</sub>/NF and MoSe<sub>2</sub>-RuSe<sub>2</sub>/NF.

**Figure S6** High-resolution XPS spectra of Se 3d in MoSe<sub>2</sub>-RuSe<sub>2</sub> and MoSe<sub>2</sub>-RuSe<sub>2</sub>/NF.

**Figure S7** CV curves of (a) NF, (b) Pt/C, (c) MoSe<sub>2</sub>/NF, (d) RuSe<sub>2</sub>/NF, and (e) MoSe<sub>2</sub>-RuSe<sub>2</sub>/NF for HER in capacitive region at scan rates from 20 to 120 mV s<sup>-1</sup> in 1.0 M KOH.

**Figure S8** CV curves of (a) NF, (b) RuO<sub>2</sub>, (c) MoSe<sub>2</sub>/NF, (d) RuSe<sub>2</sub>/NF, and (e) MoSe<sub>2</sub>-RuSe<sub>2</sub>/NF for OER in capacitive region at scan rates from 20 to 120 mV s<sup>-1</sup> in 1.0 M KOH.

**Figure S9** Chronopotentiometry test of MoSe<sub>2</sub>-RuSe<sub>2</sub>/NF at 500 mA cm<sup>-2</sup> for HER and OER in 1.0 M KOH.

**Figure S10** CV curves of MoSe<sub>2</sub>-RuSe<sub>2</sub>/NF for HER in capacitive region at scan rates from 20 to 120 mV s<sup>-1</sup> in (a) 1.0 M KOH, (b) 1.0 M KOH + 0.5 M NaCl and (c) 1.0 M KOH + seawater.

**Figure S11** CV curves of MoSe<sub>2</sub>-RuSe<sub>2</sub>/NF for OER in capacitive region at scan rates from 20 to 120 mV s<sup>-1</sup> in (a) 1.0 M KOH, (b) 1.0 M KOH + 0.5 M NaCl and (c) 1.0 M KOH + seawater.

**Figure S12** HER and OER performances in 1.0 M KOH + seawater. (a and d) LSV curves for HER and OER, (b and e) Tafel slopes, (c) overpotential at 10, 100, 200 and 500 mA cm<sup>-2</sup> and (f) Chronopotentiometry test of MoSe<sub>2</sub>-RuSe<sub>2</sub>/NF at 500 mA cm<sup>-2</sup> for HER and OER.

**Figure S13** CV curves of MoSe<sub>2</sub>-RuSe<sub>2</sub>/NF catalysts with Mo/Ru ratios of (a) 3:1, (b) 4:1, (c) 5:1 and (d) 6:1 for HER in capacitive region at scan rates from 20 to 120 mV s<sup>-1</sup> in 1.0 M KOH + seawater.

**Figure S14** Scanning rate dependence of capacitance current of MoSe<sub>2</sub>-RuSe<sub>2</sub>/NF catalysts with various Mo/Ru ratios for HER in capacitive region at scan rates from 20 to 120 mV s<sup>-1</sup> in 1.0 M KOH + seawater.

**Figure S15** CV curves MoSe<sub>2</sub>-RuSe<sub>2</sub>/NF catalysts with Mo/Ru ratio of (a) 3:1, (b) 4:1, (c) 5:1



and (d) 6:1 for OER in capacitive region at scan rates from 20 to 120 mV s<sup>-1</sup> in 1.0 M KOH + seawater.

**Figure S16** Scanning rate dependence of capacitance current of MoSe<sub>2</sub>-RuSe<sub>2</sub>/NF catalyst with various Mo/Ru ratios for OER in capacitive region at scan rates from 20 to 120 mV s<sup>-1</sup> in 1.0 M KOH + seawater.

**Figure S17** LSV curves for overall water splitting in 1.0 M KOH + seawater and seawater.

**Figure S18** LSV curves of MoSe<sub>2</sub>-RuSe<sub>2</sub>/NF before and after stability test for (a) HER and (b) OER in 1.0 M KOH + seawater.

**Figure S19** IV test of two electrodes, and the slopes represent the electrical conductivity.

**Figure S20** Faradaic efficiency measurements of O<sub>2</sub> in 1.0 M KOH + seawater. (a) Photograph of the as-constructed water electrolyzer and water drainage system with recorded scales measuring produced gases. (b) Experimental gas volumes of H<sub>2</sub> and O<sub>2</sub> during water splitting at a current density of 400 mA cm<sup>-2</sup>, and the corresponding FE of MoSe<sub>2</sub>-RuSe<sub>2</sub>/NF.

**Figure S21** SEM images of MoSe<sub>2</sub>-RuSe<sub>2</sub>/NF after stability test with different magnifications.

**Figure S22** High-resolution XPS spectra of MoSe<sub>2</sub>-RuSe<sub>2</sub>/NF after stability test. (a) Mo 3d, (b) Ru 3d, (c) Ru 3p and (d) Se 3d.

**Figure S23** Theoretical calculation model of (a) (015) crystal plane of MoSe<sub>2</sub>, (b) (211) crystal plane of RuSe<sub>2</sub> and (c) MoSe<sub>2</sub>-RuSe<sub>2</sub>.

**Figure S24** The adsorption model of (a) MoSe<sub>2</sub>, (b) RuSe<sub>2</sub> and (c) MoSe<sub>2</sub>-RuSe<sub>2</sub> for H<sub>2</sub>O.

**Figure S25** DOS of MoSe<sub>2</sub>, RuSe<sub>2</sub> and MoSe<sub>2</sub>-RuSe<sub>2</sub>.

**Figure S26** Charge density difference maps of different catalysts. (a) MoSe<sub>2</sub>, (b) RuSe<sub>2</sub> and (c) MoSe<sub>2</sub>-RuSe<sub>2</sub>. Blue regions represent electron depletion, and yellow regions represent electron accumulation.

**Table S1** The ICP of MoSe<sub>2</sub>-RuSe<sub>2</sub>/NF.

**Table S2** Performance comparison between the MoSe<sub>2</sub>-RuSe<sub>2</sub>/NF based catalysts and recently reported electrocatalysts at 100 mA cm<sup>-2</sup>.

**Table S3** Bader charge analysis of MoSe<sub>2</sub>-RuSe<sub>2</sub>.



## **Experimental Section**

### **1. Materials**

Ruthenium (III) chloride anhydrous ( $\text{RuCl}_3$ , Ru content 45~55%), Sodium borohydride ( $\text{NaBH}_4$ , >98%), Platinum on charcoal (Pt, 20%) and Ruthenium dioxide ( $\text{RuO}_2$ , 99.9%) were purchased from Shanghai Macklin Biochemical Co. Ltd., China. Potassium hydroxide (KOH) and Sodium molybdate dihydrate ( $\text{Na}_2\text{MoO}_4 \cdot 2\text{H}_2\text{O}$ , 99.0%) were bought from Shanghai Aladdin Bio-Chem Technology Co. Ltd., China. Hydrochloric acid (HCl, 36%) was got from Guangdong Xi long Chemical Reagent Co. Ltd., China. Nafion perfluorinated resin solution (5 wt.%) was purchased from Sigma Aldrich. All the chemicals were used directly without further purification.

### **2. Characterization**

The samples were characterized by field emission scanning electron microscope (FE-SEM, Hitachi S-4800, Japan), transmission electron microscope (TEM, Thermo Scientific Talos F200X) with energy dispersive X-ray spectroscopy (EDX) accessory, X-ray diffraction (XRD) with Cu  $K\alpha$  radiation ( $\lambda=1.5418 \text{ \AA}$ ) at  $2\theta$  range of  $10\text{--}90^\circ$  (Bruker, AXS D8 Advance, Germany), Raman spectrometer (Renishaw In Via), X-ray photoemission spectroscopy (XPS, Thermo Scientific K-Alpha spectrometer), inductively coupled plasma optical emission spectrometer (ICP-OES, Agilent ICP OES 730). The sample digestion process for ICP-OES test was added in aqua regia solution and heated at  $180^\circ\text{C}$  for 8 h. And C 1s value was set at 284.8 eV for charge corrections during XPS analysis. The specific surface areas of samples were conducted on Micromeritics ASAP 2460 system using the Brunauer-Emmett-Teller (BET) method, and  $\text{N}_2$  adsorption/desorption property was measured at 77 K. The detection and quantification of  $\text{Cl}^-$  were carried out using an ion chromatograph (IC) (Thermo Fisher Scientific ICS-600).

### **3. Electrochemical measurements**

The catalysts electrochemical performances of hydrogen evolution reaction (HER) and oxygen evolution reaction (OER) were tested through a three-electrode system on the electrochemical workstation (CHI 660E). The as-prepared electrodes ( $3 \text{ mm} \times 3 \text{ mm}$ ), carbon rods, and Hg/HgO served as the working electrode, counter and reference electrode, respectively. Linear sweep voltammetry (LSV) curves were conducted in 1.0 M KOH, 1.0 M



KOH + 0.5 NaCl and 1.0 M KOH + seawater solution with a scan rate of 5 mV s<sup>-1</sup> at 25 °C. For HER and OER, cyclic voltammetry (CV) measurements were conducted with various scan rates in the potential ranges of 0.8-0.9 V and 0.3-0.4 V, respectively.

To prepare Pt/C/NF or RuO<sub>2</sub>/NF working electrodes: 2.5 mg Pt/C (or RuO<sub>2</sub>) catalyst, 240 μL ethanol, 240 μL deionized water, and 20 μL 5 wt.% Nafion solution were ultrasonically vibrated for 30 min to form ink. 10 μL of this ink was dropped onto the pretreated NF electrode surface and dried under an infrared lamp for use.

Before the HER and OER process, the three-electrode system was injected with Ar for 30 min to maintain its stability. The frequency range of electrochemical impedance spectroscopy (EIS) measurements ranged from 10<sup>-2</sup> to 10<sup>5</sup> Hz at the open circuit potential by applying 5 mV signal. The potential was converted to RHE through equations:

$$E_{RHE} = E_{Hg/HgO} + 0.924 V \quad (1)$$

The H<sub>2</sub> conversion efficiencies of MoSe<sub>2</sub>-RuSe<sub>2</sub>/NF were evaluated from the TOF values, which were obtained according to the following equation:<sup>1</sup>

$$TOF(s^{-1}) = \frac{jA}{2Fn} \quad (2)$$

Where j is the current density, A is the working electrode area, 2 is the number of electrons consumed to form 1 mol H<sub>2</sub>, F represents the Faraday constant (96500 C mol<sup>-1</sup>), n (mol) is the number of moles of loaded metals that can be evaluated based on the analysis of ICP-OES measurements (The Ru contents of MoSe<sub>2</sub>-RuSe<sub>2</sub>/NF is 2.34 wt%).

**Table S1** The ICP of MoSe<sub>2</sub>-RuSe<sub>2</sub>/NF.

| m <sub>0</sub> (g) | V <sub>0</sub> (mL) | Test elements | C <sub>x</sub> (mg/kg) | W (%) |
|--------------------|---------------------|---------------|------------------------|-------|
| 0.0516             | 25                  | Ru            | 287.0026906            | 0.03  |
| 0.0516             | 25                  | Mo            | 1336.197453            | 0.13  |
| 0.0516             | 25                  | Se            | 127058.735             | 12.7  |
| 0.0516             | 25                  | Ni            | 815966.7087            | 81.6  |



The Faradaic efficiency (FE) was measured using a water-displacement setup in a sealed two-compartment electrolysis cell. The MoSe<sub>2</sub>-RuSe<sub>2</sub>/NF sample was employed as both the cathode and anode. Throughout the constant-current electrolysis at 400 mA cm<sup>-2</sup>, the H<sub>2</sub> and O<sub>2</sub> gases produced were separately collected by drainage into water-filled, graduated gas burettes from their respective compartments. The recorded gas volumes were then used to calculate the FE according to the formula below:

$$n_{act} = \frac{V_P}{RT} \quad (3)$$

$$n_{theo} = \frac{It}{nF} \quad (4)$$

$$FE = \frac{n_{act}}{n_{theo}} \times 100\% \quad (5)$$

where V is the volume of collected gas (L), p is the atmospheric pressure during the experiment (Pa), T is experimental temperature (K), n is the number of electron transfers (2 for H<sub>2</sub>, 4 for O<sub>2</sub>), F is Faraday's constant (96485 C mol<sup>-1</sup>), R is ideal gas constant (8.314 J mol<sup>-1</sup>·K<sup>-1</sup>), I is current (A), and T is power on time (s).

The energy efficiency (EE) of water electrolysis, which refers to the efficiency of converting electrical energy into the chemical energy of hydrogen, is specifically calculated as follows:

$$E_0 = \frac{\Delta G^0}{nF} \quad (6)$$

$$VE = \frac{E_0}{V} \quad (7)$$

$$EE = VE \times FE \times 100\% \quad (8)$$

Where  $\Delta G^0$  is the Gibbs free energy change for the decomposition of water into H<sub>2</sub> and O<sub>2</sub> (237.22 kJ/mol), n is the number of electron transfers, F is Faraday's constant (96485 C mol<sup>-1</sup>), E<sub>0</sub> is the reference voltage for the low heating value of hydrogen, V is the actual slot voltage (V), VE is the voltage efficiency.

#### 4. DFT calculations

The DFT calculations were based on projector-augmented-wave (PAW) method by the Vienna Ab Initiation Simulation Package (VASP).<sup>2</sup> The generalized gradient approximation (GGA) of the Perdew-Burke-Ernzerh of (PBE) functional was adopted to all reaction models.<sup>3</sup> The force convergence standard was 0.01 eV Å<sup>-1</sup>, and the plane wave has a cutoff energy of 450 eV.<sup>1</sup> The



convergence standard of electronics was  $10^{-5}$  eV, and  $5 \times 5 \times 1$  k-point was applied to all models, Grimme's DFT-D<sub>3</sub> method was applied to all models. The amount of charge transfer was estimated by integrating the charge density difference projected onto two-dimensional planes, following the approaches reported<sup>4,5</sup>.



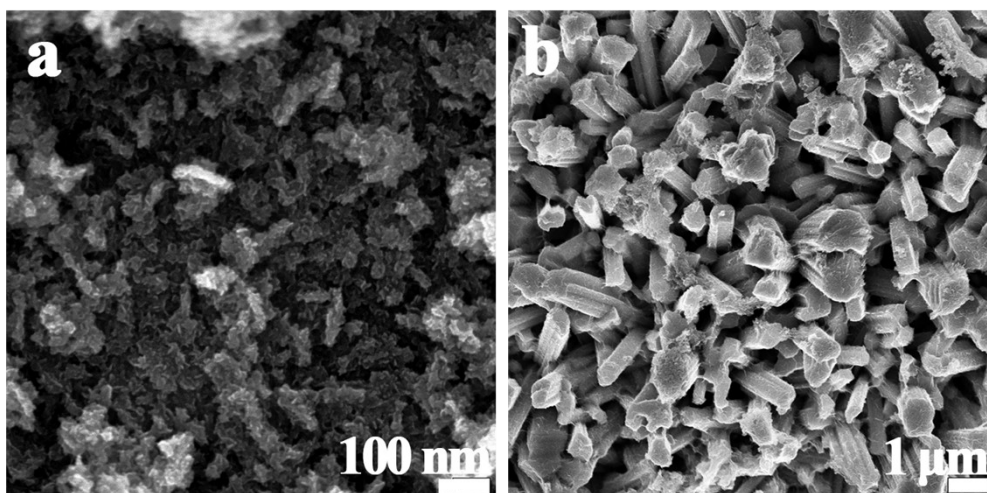

**Figure S1** SEM images of (a) MoSe<sub>2</sub>/NF and (b) RuSe<sub>2</sub>/NF.



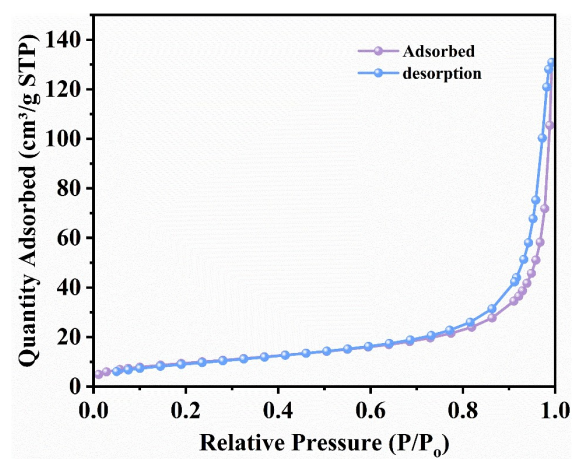

**Figure S2** Nitrogen (N<sub>2</sub>) adsorption-desorption isotherms of MoSe<sub>2</sub>-RuSe<sub>2</sub> at 77 K.



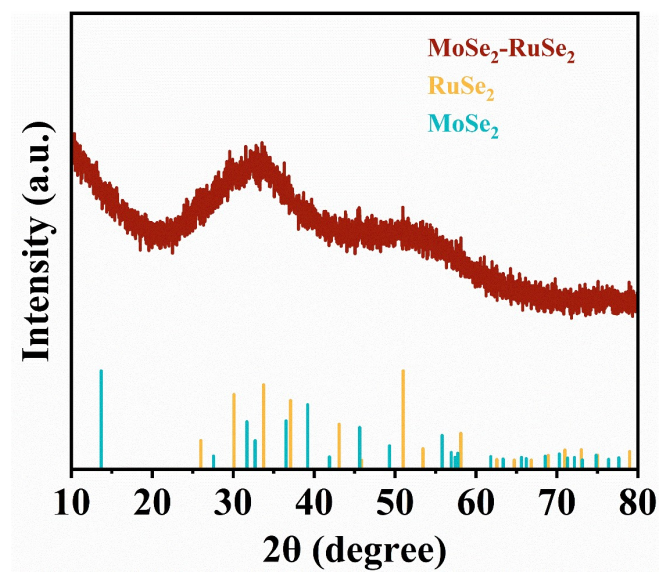

Figure S3 XRD patterns of  $\text{MoSe}_2\text{-RuSe}_2$ .



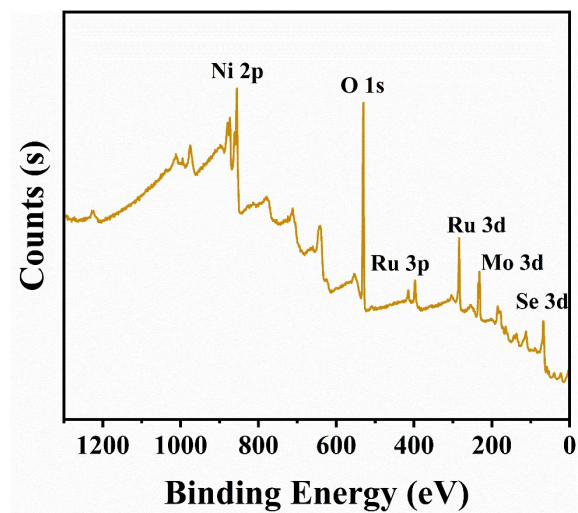

**Figure S4** XPS survey spectrum of MoSe<sub>2</sub>-RuSe<sub>2</sub>/NF.



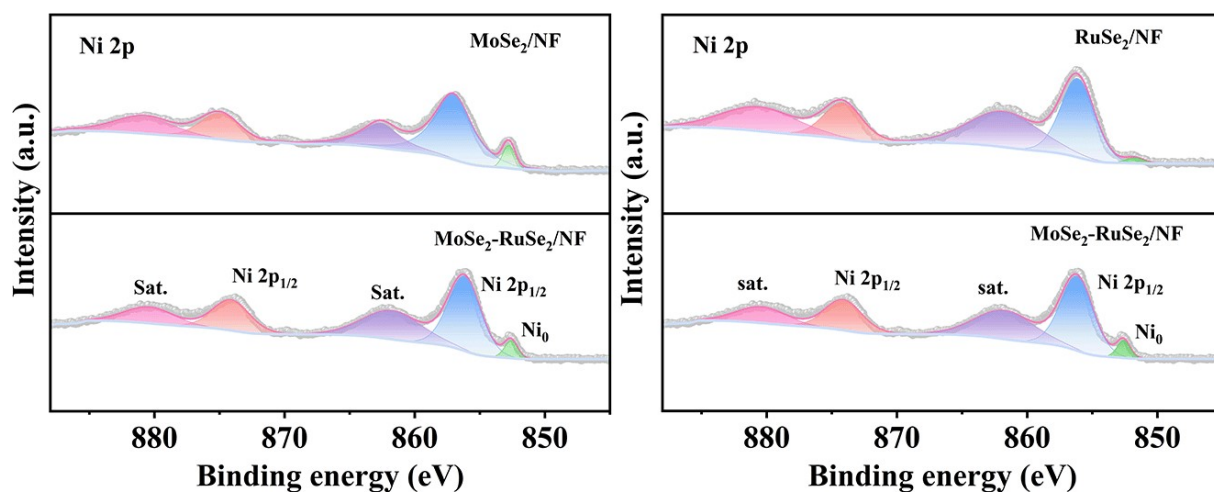

**Figure S5** High-resolution XPS spectra of Ni 2p in MoSe<sub>2</sub>/NF, RuSe<sub>2</sub>/NF and MoSe<sub>2</sub>-RuSe<sub>2</sub>/NF.



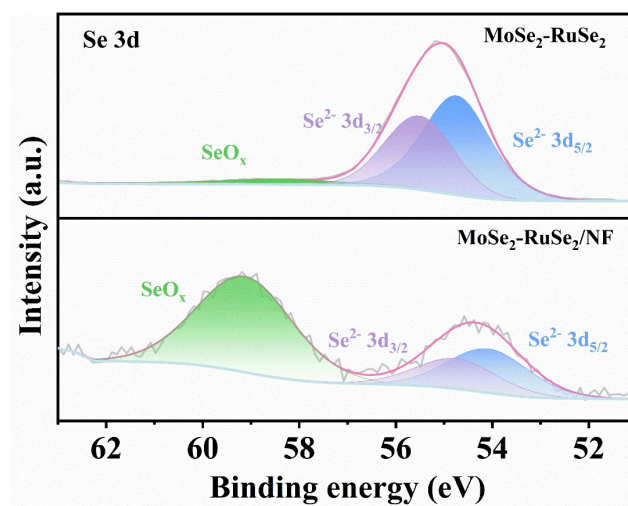

**Figure S6** High-resolution XPS spectra of Se 3d in MoSe<sub>2</sub>-RuSe<sub>2</sub> and MoSe<sub>2</sub>-RuSe<sub>2</sub>/NF.



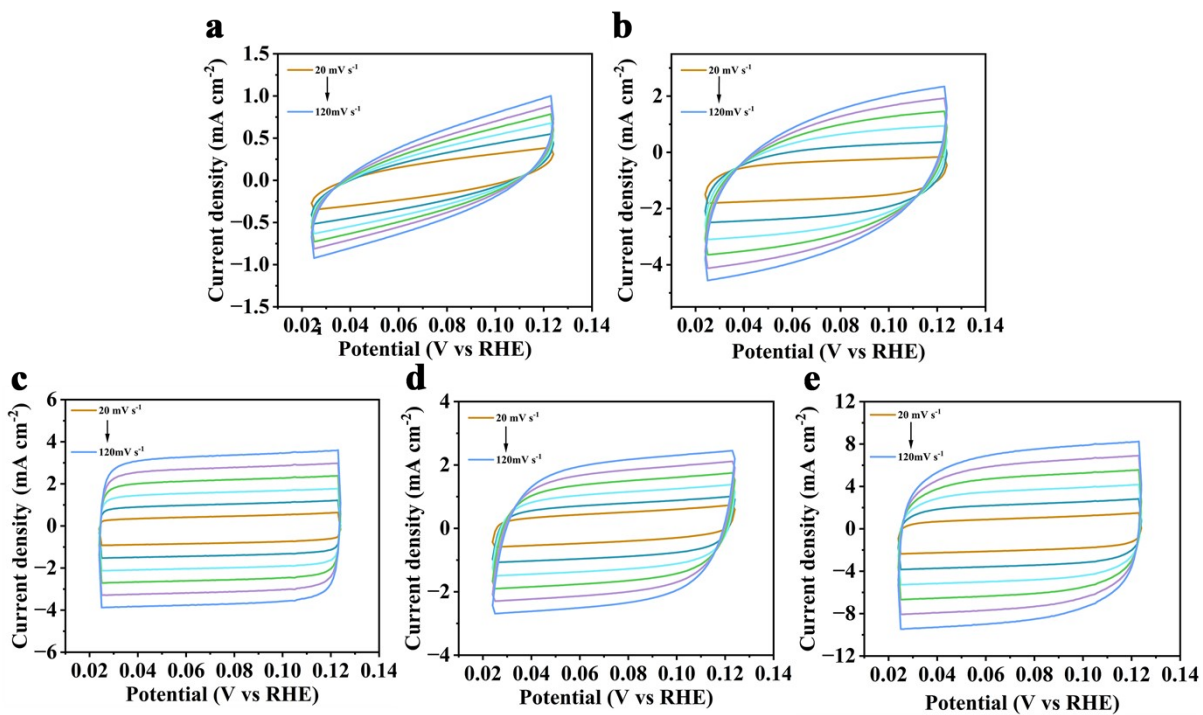

**Figure S7** CV curves of (a) NF, (b) Pt/C, (c) MoSe<sub>2</sub>/NF, (d) RuSe<sub>2</sub>/NF, and (e) MoSe<sub>2</sub>-RuSe<sub>2</sub>/NF for HER in capacitive region at scan rates from 20 to 120 mV s<sup>-1</sup> in 1.0 M KOH.



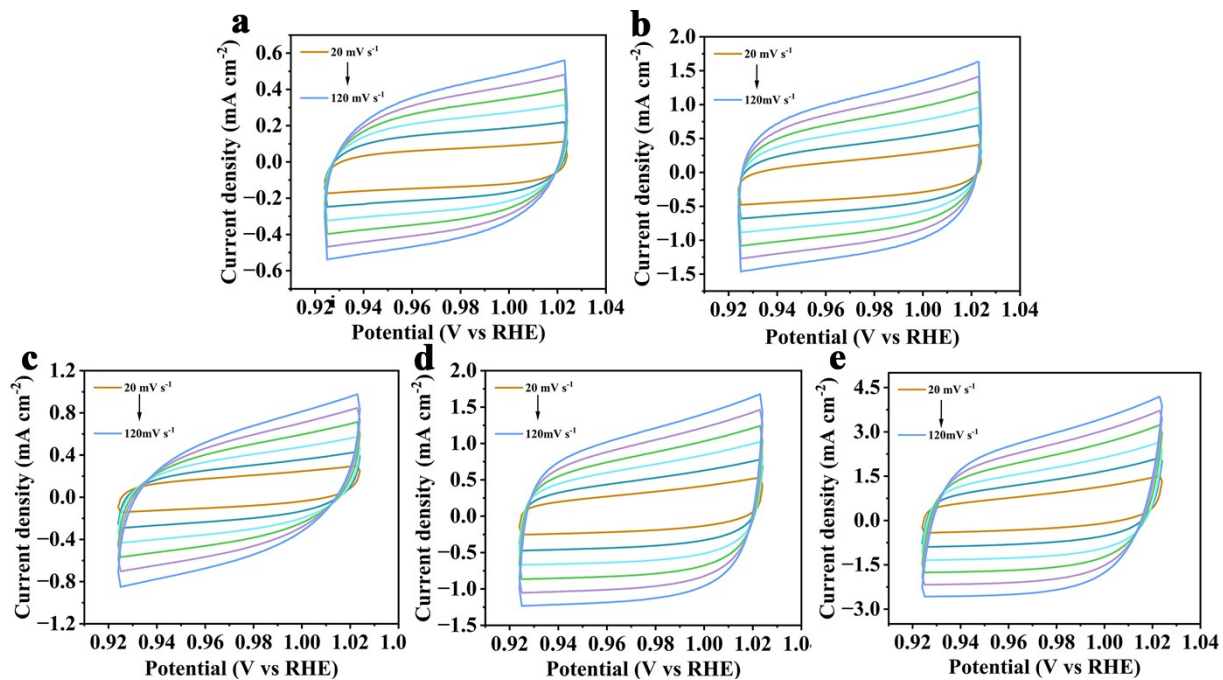

**Figure S8** CV curves of (a) NF, (b) RuO<sub>2</sub>, (c) MoSe<sub>2</sub>/NF, (d) RuSe<sub>2</sub>/NF, and (e) MoSe<sub>2</sub>-RuSe<sub>2</sub>/NF for OER in capacitive region at scan rates from 20 to 120 mV s<sup>-1</sup> in 1.0 M KOH.



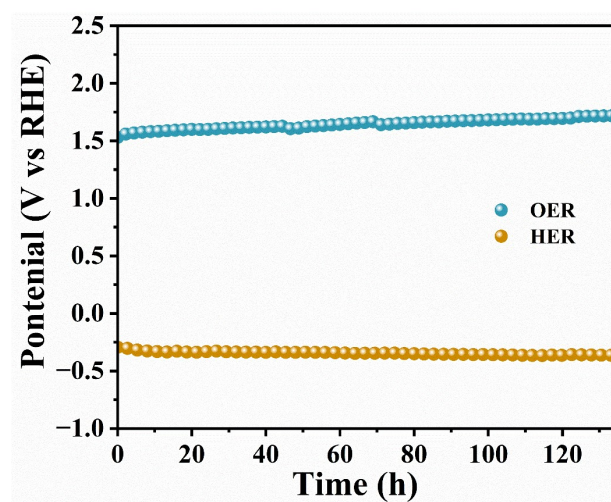

**Figure S9** Chronopotentiometry test of MoSe<sub>2</sub>-RuSe<sub>2</sub>/NF at 500 mA cm<sup>-2</sup> for HER and OER in 1.0 M KOH.



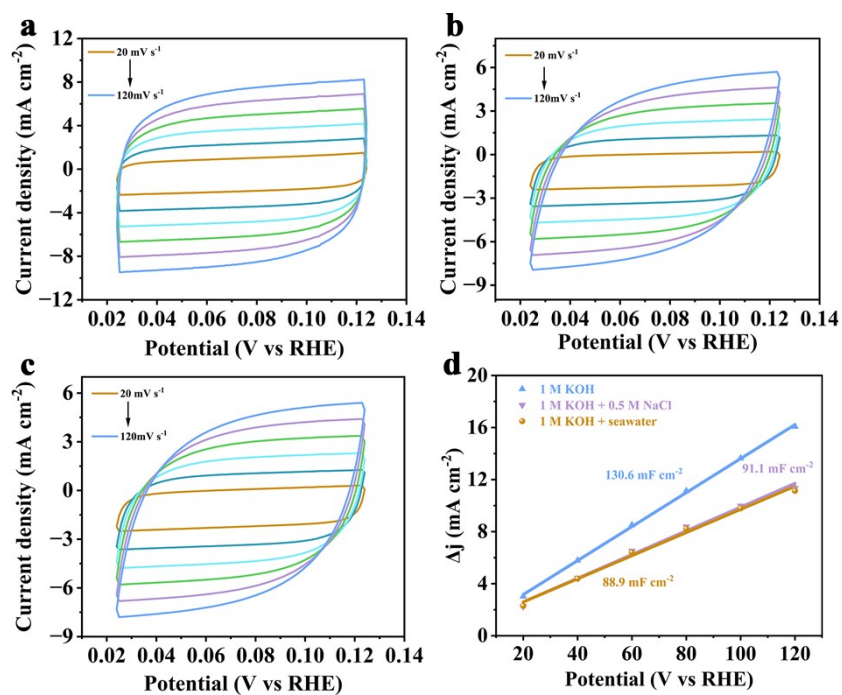

**Figure S10** CV curves of MoSe<sub>2</sub>-RuSe<sub>2</sub>/NF for HER in capacitive region at scan rates from 20 to 120 mV s<sup>-1</sup> in (a) 1.0 M KOH, (b) 1.0 M KOH + 0.5 M NaCl and (c) 1.0 M KOH + seawater.



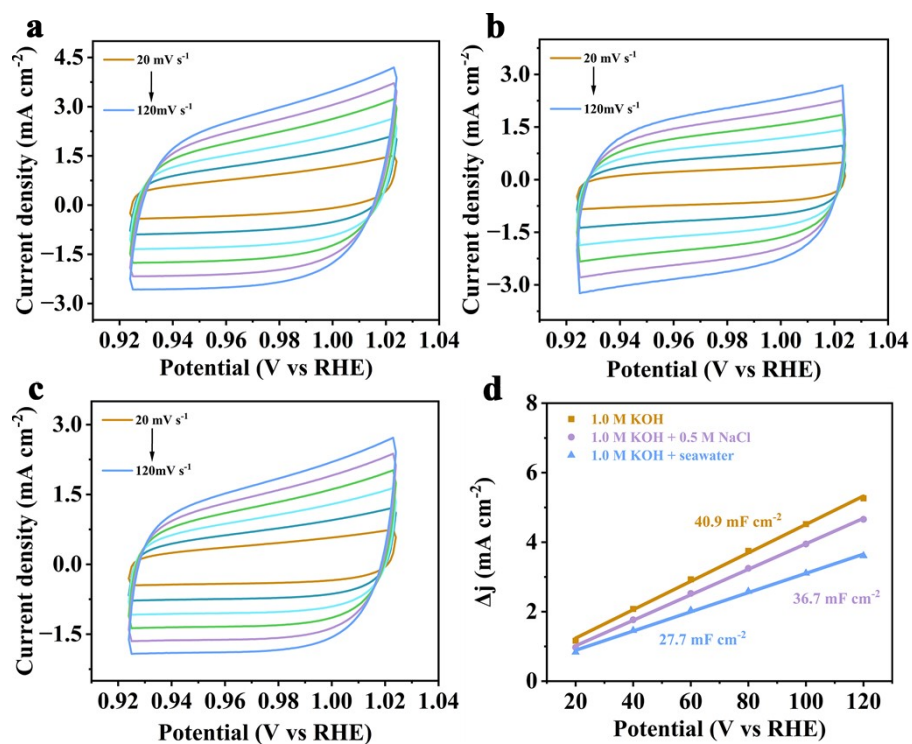

**Figure S11** CV curves of MoSe<sub>2</sub>-RuSe<sub>2</sub>/NF for OER in capacitive region at scan rates from 20 to 120 mV s<sup>-1</sup> in (a) 1.0 M KOH, (b) 1.0 M KOH + 0.5 M NaCl and (c) 1.0 M KOH + seawater.



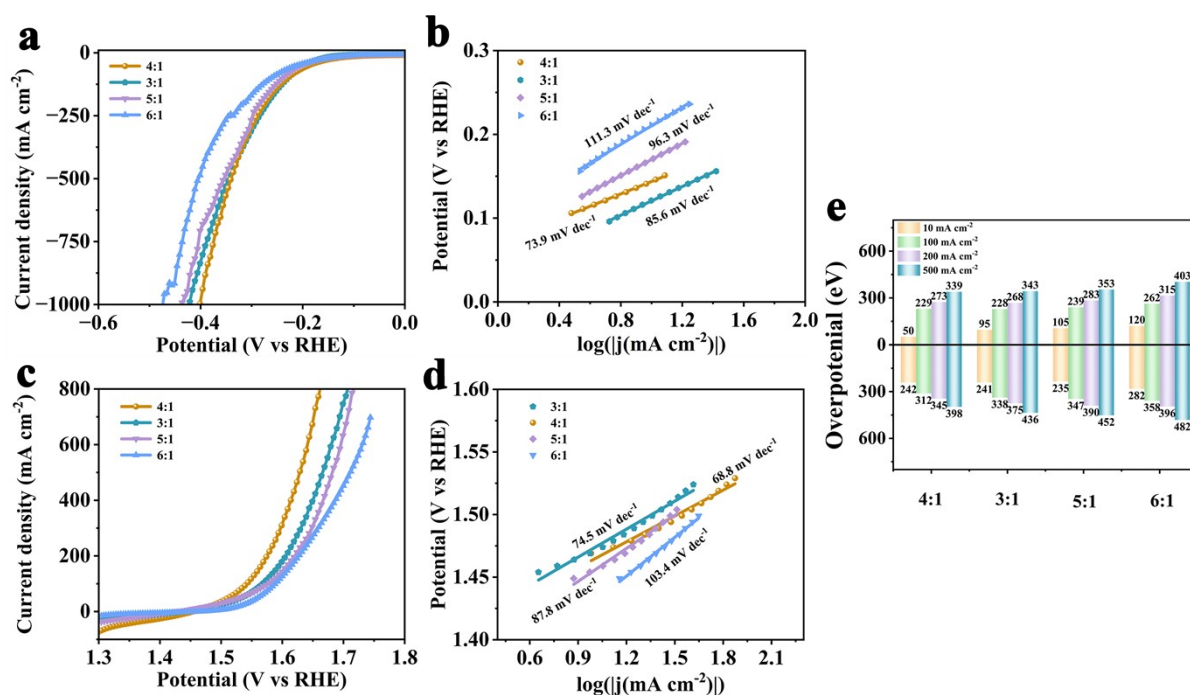

**Figure S12** HER and OER performances in 1.0 M KOH + seawater. (a and d) LSV curves for HER and OER, (b and e) Tafel slopes, (c) overpotential at 10, 100, 200 and 500 mA cm<sup>-2</sup> and (f) Chronopotentiometry test of MoSe<sub>2</sub>-RuSe<sub>2</sub>/NF at 500 mA cm<sup>-2</sup> for HER and OER.



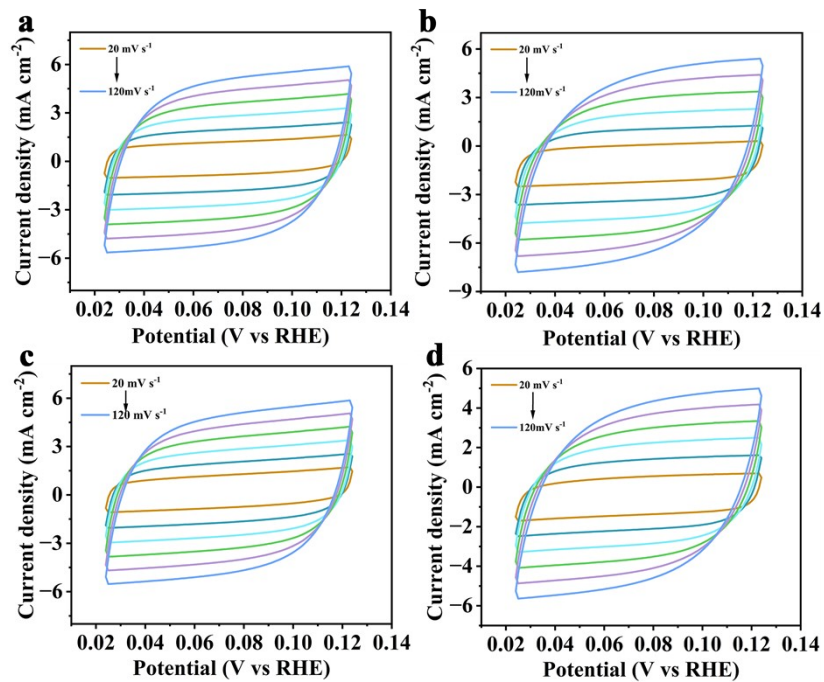

**Figure S13** CV curves of MoSe<sub>2</sub>-RuSe<sub>2</sub>/NF catalysts with Mo/Ru ratios of (a) 3:1, (b) 4:1, (c) 5:1 and (d) 6:1 for HER in capacitive region at scan rates from 20 to 120 mV s<sup>-1</sup> in 1.0 M KOH + seawater.



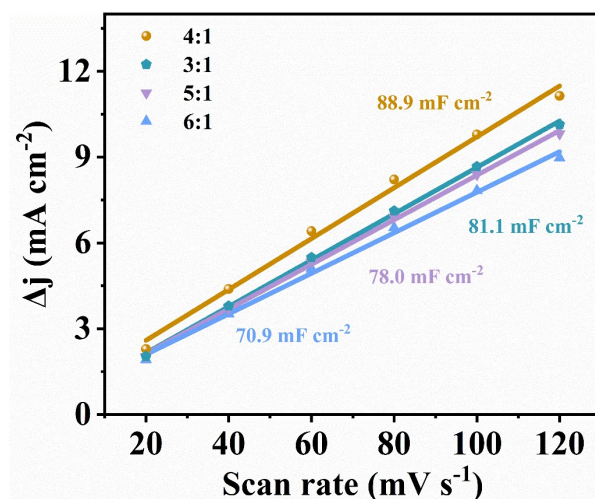

**Figure S14** Scanning rate dependence of capacitance current of MoSe<sub>2</sub>-RuSe<sub>2</sub>/NF catalysts with various Mo/Ru ratios for HER in capacitive region at scan rates from 20 to 120 mV s<sup>-1</sup> in 1.0 M KOH + seawater.



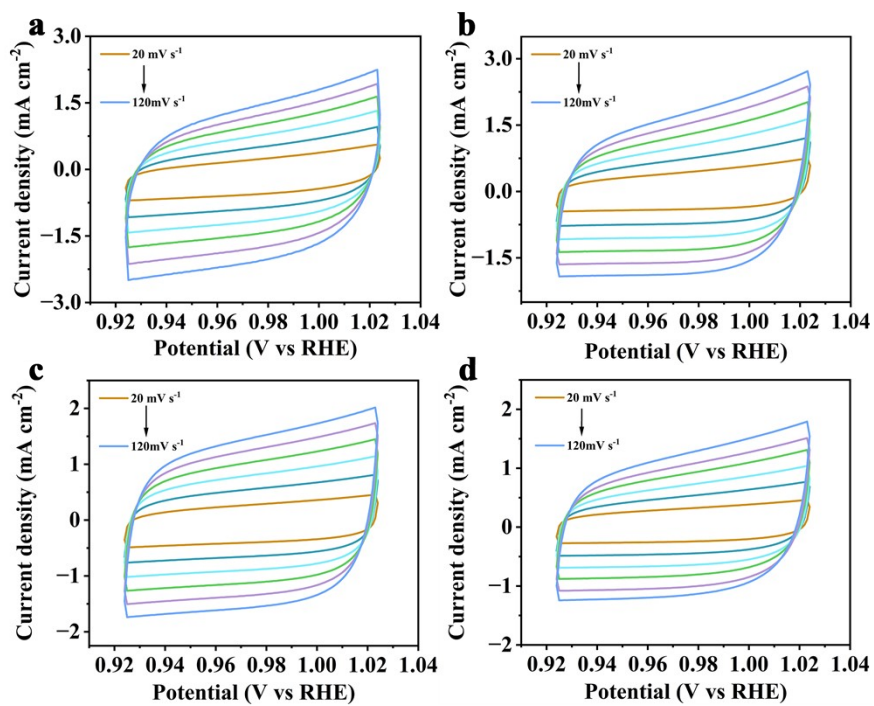

**Figure S15** CV curves MoSe<sub>2</sub>-RuSe<sub>2</sub>/NF catalysts with Mo/Ru ratio of (a) 3:1, (b) 4:1, (c) 5:1 and (d) 6:1 for OER in capacitive region at scan rates from 20 to 120 mV s<sup>-1</sup> in 1.0 M KOH + seawater.



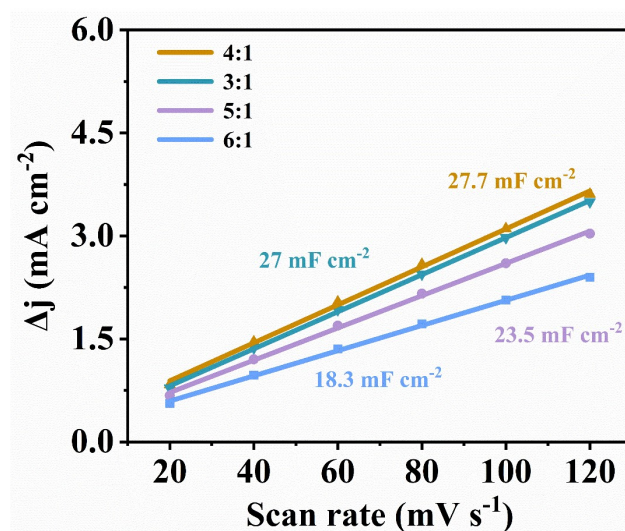

**Figure S16** Scanning rate dependence of capacitance current of MoSe<sub>2</sub>-RuSe<sub>2</sub>/NF catalyst with various Mo/Ru ratios for OER in capacitive region at scan rates from 20 to 120 mV s<sup>-1</sup> in 1.0 M KOH + seawater.



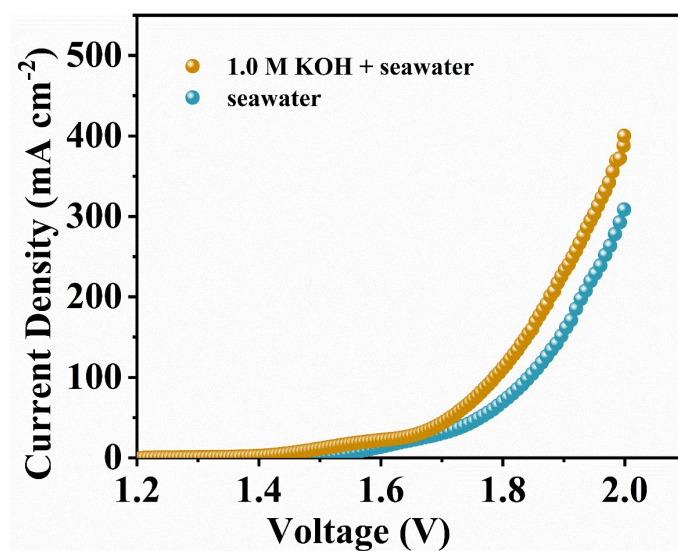

**Figure S17** LSV curves for overall water splitting in 1.0 M KOH + seawater and seawater.



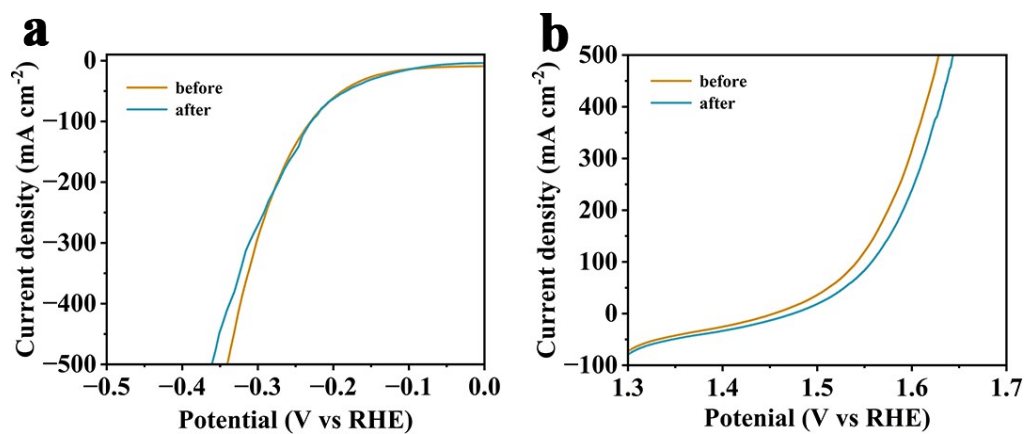

**Figure S18** LSV curves of MoSe<sub>2</sub>-RuSe<sub>2</sub>/NF before and after stability test for (a) HER and (b) OER in 1.0 M KOH + seawater.



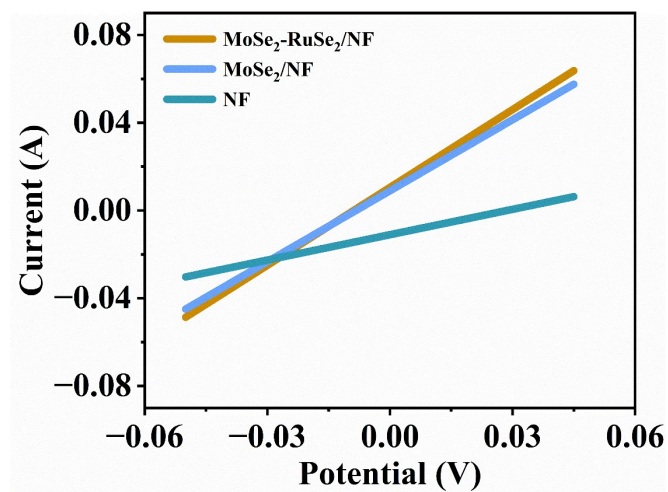

**Figure S19** IV test of two electrodes, and the slops represent the electrical conductivity.



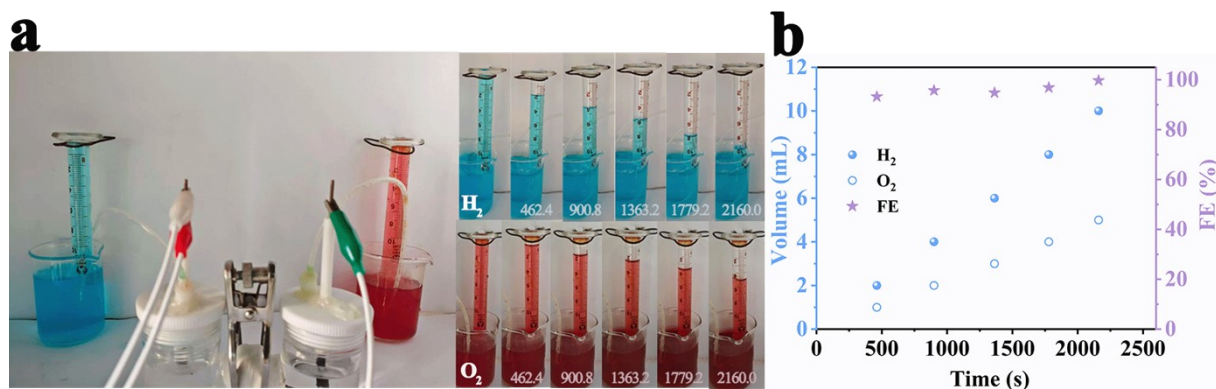

**Figure S20** Faradaic efficiency measurements of O<sub>2</sub> in 1.0 M KOH + seawater. (a) Photograph of the as-constructed water electrolyzer and water drainage system with recorded scales measuring produced gases. (b) Experimental gas volumes of H<sub>2</sub> and O<sub>2</sub> during water splitting at a current density of 400 mA cm<sup>-2</sup>, and the corresponding FE of MoSe<sub>2</sub>-RuSe<sub>2</sub>/NF.



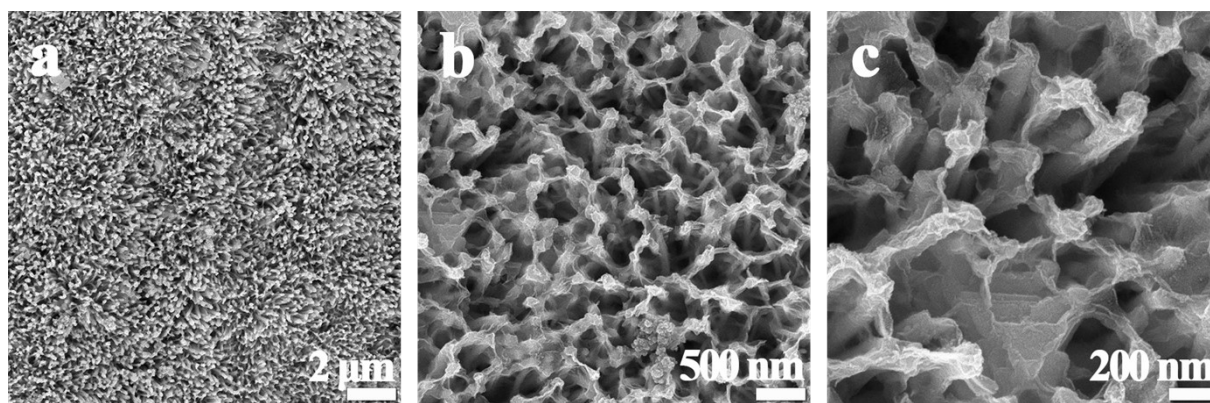

**Figure S21** SEM images of MoSe<sub>2</sub>-RuSe<sub>2</sub>/NF after stability test with different magnifications.



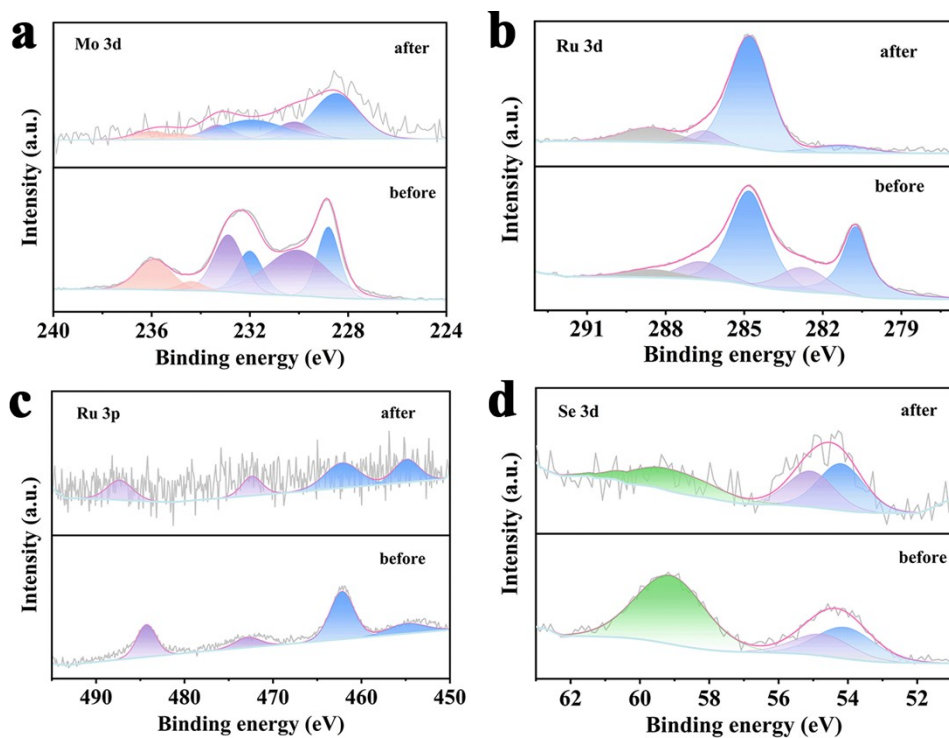

**Figure S22** High-resolution XPS spectra of MoSe<sub>2</sub>-RuSe<sub>2</sub>/NF after stability test. (a) Mo 3d, (b) Ru 3d, (c) Ru 3p and (d) Se 3d.



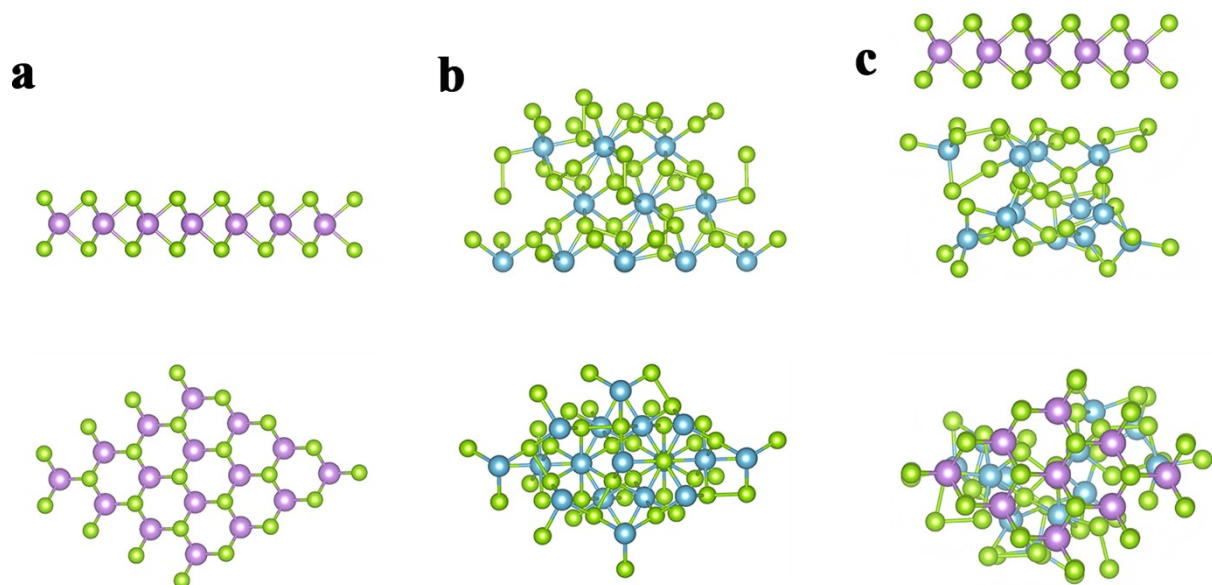

**Figure S23** Theoretical calculation model of (a) (015) crystal plane of MoSe<sub>2</sub>, (b) (211) crystal plane of RuSe<sub>2</sub> and (c) MoSe<sub>2</sub>-RuSe<sub>2</sub>.



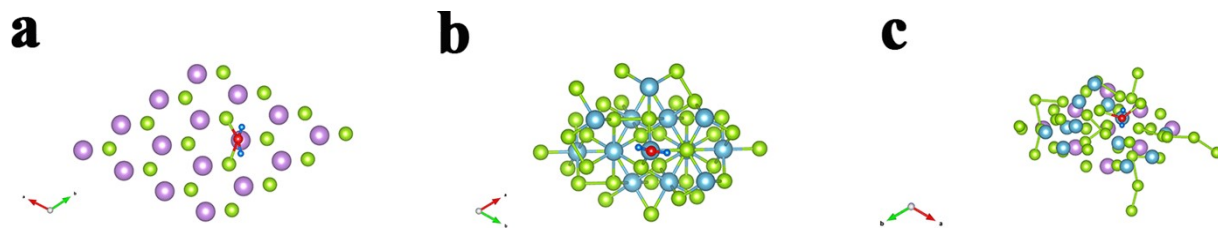

**Figure S24** The adsorption model of (a) MoSe<sub>2</sub>, (b) RuSe<sub>2</sub> and (c) MoSe<sub>2</sub>-RuSe<sub>2</sub> for H<sub>2</sub>O.



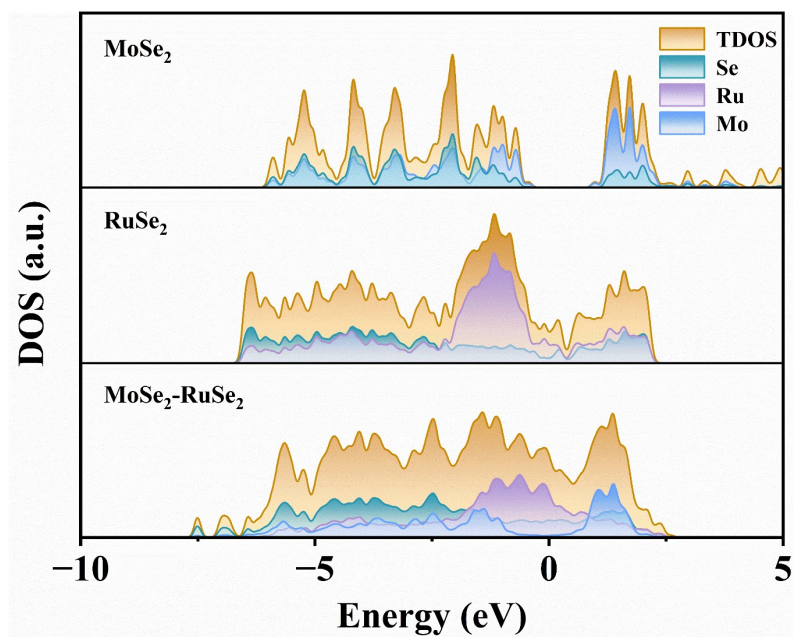

**Figure S25** DOS of  $\text{MoSe}_2$ ,  $\text{RuSe}_2$  and  $\text{MoSe}_2\text{-RuSe}_2$ .



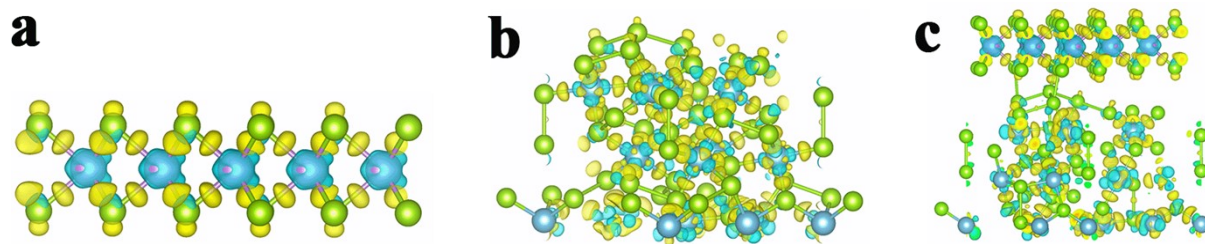

**Figure S26** Charge density difference maps of different catalysts. (a) MoSe<sub>2</sub>, (b) RuSe<sub>2</sub> and (c) MoSe<sub>2</sub>-RuSe<sub>2</sub>. Blue regions represent electron depletion, and yellow regions represent electron accumulation.



**Table S2** Performance comparison between the MoSe<sub>2</sub>-RuSe<sub>2</sub>/NF based catalysts and recently reported electrocatalysts at 100 mA cm<sup>-2</sup>.

| Electrolyzer                                                                            | Electrolytes                         | Cell Voltage<br>(V) | Stability<br>(h) | References |
|-----------------------------------------------------------------------------------------|--------------------------------------|---------------------|------------------|------------|
| NiFeCd-LDH<br>(+, -)                                                                    | 1.0 M KOH +<br>seawater              | 1.79                | 30               | 6          |
| RuSe <sub>2</sub> CoSe <sub>2</sub> /NC<br>(+, -)                                       | 1.0 M KOH                            | 1.77                | 140              | 7          |
| CoS <sub>2</sub> @CoFe-LDH<br>(+, -)                                                    | 1.0 M KOH +<br>seawater              | 1.80                | 45               | 8          |
| NiFe-LDH@NiCoP/NF<br>(+, -)                                                             | 1.0 M KOH                            | 1.90                | 100              | 9          |
| Ni <sub>2</sub> P-Fe <sub>2</sub> P/NF<br>(+, -)                                        | 1.0 M KOH<br>1.0 M KOH +<br>seawater | 1.68<br>1.81        | \<br>48          | 10         |
| Co-NC/CFP<br>(+, -)                                                                     | 1.0 M KOH                            | 1.85                | 100              | 11         |
| ZnP@Ni <sub>2</sub> P-NiSe <sub>2</sub><br>(+,-)                                        | 1.0 M KOH +<br>seawater              | 1.75                | 35               | 12         |
| Ni <sub>12.5</sub> -CuMoSe/NF<br>(+, -)                                                 | 1.0 M KOH                            | 1.87                | 120              | 13         |
| Ru/Ni <sub>3</sub> NNi (+, -)                                                           | 1.0 M KOH                            | 1.76                | 20               | 14         |
| V-Co <sub>3</sub> O <sub>4</sub> (Ov)-250(+, -)                                         | 1.0 M KOH +<br>seawater              | 1.68                | 100              | 15         |
| Co-Mo-50-9 h (+, -)                                                                     | 1.0 M KOH                            | 1.75                | 96               | 16         |
| NiP <sub>2</sub> -Mo <sub>8</sub> P <sub>5</sub> @NF (-)   <br>RuO <sub>2</sub> @NF (+) | 1.0 M KOH                            | 1.67                | 120              | 17         |
| NiMoS/NFM-LDH (+, -<br>)                                                                | 1.0 M KOH                            | 1.89                | 100              | 18         |



|                                                                   |                         |                                   |                                 |           |
|-------------------------------------------------------------------|-------------------------|-----------------------------------|---------------------------------|-----------|
| Fe-NiS <sub>2</sub> @NaBH <sub>4</sub> (+, -)                     | 1.0 M KOH               | 1.77                              | 360                             | 19        |
| Ru-NC-500 (-)   <br>NiFe (+)                                      | 1.0 M KOH               | 1.80                              | 100                             | 20        |
| HfO <sub>x</sub> -in-Ir SSC/CP (-)   <br>RuO <sub>2</sub> /CP (+) | 1.0 M KOH               | 2.22<br>at 1.0 A cm <sup>-2</sup> | 50 at 1.0 A<br>cm <sup>-2</sup> | 21        |
| MoSe <sub>2</sub> -RuSe <sub>2</sub> /NF<br>(+, -)                | 1.0 M KOH +<br>seawater | 1.76                              | 200                             | This work |

---



**Table S3** Bader charge analysis of MoSe<sub>2</sub>-RuSe<sub>2</sub>.

| Atomic species | Atomic number | Pseudo-potential charge | Barder   | Change in electric charge |
|----------------|---------------|-------------------------|----------|---------------------------|
| Mo1            | 1             | 6                       | 6.468939 | -0.468939                 |
| Mo2            | 2             | 6                       | 6.501891 | -0.501891                 |
| Mo3            | 3             | 6                       | 6.488284 | -0.488284                 |
| Mo4            | 4             | 6                       | 6.425326 | -0.425326                 |
| Mo5            | 5             | 6                       | 6.253012 | -0.253012                 |
| Mo6            | 6             | 6                       | 6.462148 | -0.462148                 |
| Mo7            | 7             | 6                       | 6.415516 | -0.415516                 |
| Mo8            | 8             | 6                       | 6.515525 | -0.515525                 |
| Mo9            | 9             | 6                       | 6.517894 | -0.517894                 |
| Se1            | 10            | 6                       | 5.883244 | 0.116756                  |
| Se2            | 11            | 6                       | 5.745158 | 0.254842                  |
| Se3            | 12            | 6                       | 5.833557 | 0.166443                  |
| Se4            | 13            | 6                       | 5.866031 | 0.133969                  |
| Se5            | 14            | 6                       | 5.690902 | 0.309098                  |
| Se6            | 15            | 6                       | 5.92397  | 0.07603                   |
| Se7            | 16            | 6                       | 5.749446 | 0.250554                  |
| Se8            | 17            | 6                       | 5.878596 | 0.121404                  |
| Se9            | 18            | 6                       | 5.871203 | 0.128797                  |
| Se10           | 19            | 6                       | 5.760931 | 0.239069                  |
| Se11           | 20            | 6                       | 5.862872 | 0.137128                  |
| Se12           | 21            | 6                       | 5.811588 | 0.188412                  |
| Se13           | 22            | 6                       | 5.909512 | 0.090488                  |
| Se14           | 23            | 6                       | 5.764111 | 0.235889                  |
| Se15           | 24            | 6                       | 5.925341 | 0.074659                  |
| Se16           | 25            | 6                       | 5.752929 | 0.247071                  |
| Se17           | 26            | 6                       | 5.601845 | 0.398155                  |
| Se18           | 27            | 6                       | 5.86255  | 0.13745                   |
| Se19           | 28            | 6                       | 5.719089 | 0.280911                  |
| Se20           | 29            | 6                       | 5.845836 | 0.154164                  |
| Se21           | 30            | 6                       | 5.601083 | 0.398917                  |
| Se22           | 31            | 6                       | 5.767909 | 0.232091                  |
| Se23           | 32            | 6                       | 5.758986 | 0.241014                  |
| Se24           | 33            | 6                       | 5.539712 | 0.460288                  |
| Se25           | 34            | 6                       | 5.765804 | 0.234196                  |
| Se26           | 35            | 6                       | 5.911716 | 0.088284                  |
| Se27           | 36            | 6                       | 5.559966 | 0.440034                  |
| Se28           | 37            | 6                       | 5.71541  | 0.28459                   |
| Se29           | 38            | 6                       | 5.752642 | 0.247358                  |
| Se30           | 39            | 6                       | 5.565295 | 0.434705                  |
| Se31           | 40            | 6                       | 5.707884 | 0.292116                  |
| Se32           | 41            | 6                       | 5.779551 | 0.220449                  |



|      |    |   |          |           |
|------|----|---|----------|-----------|
| Se33 | 42 | 6 | 5.693719 | 0.306281  |
| Se34 | 43 | 6 | 5.708186 | 0.291814  |
| Se35 | 44 | 6 | 5.653136 | 0.346864  |
| Se36 | 45 | 6 | 5.68801  | 0.31199   |
| Se37 | 46 | 6 | 5.666986 | 0.333014  |
| Se38 | 47 | 6 | 5.759135 | 0.240865  |
| Se39 | 48 | 6 | 5.589695 | 0.410305  |
| Se40 | 49 | 6 | 5.583571 | 0.416429  |
| Se41 | 50 | 6 | 5.668154 | 0.331846  |
| Se42 | 51 | 6 | 5.645816 | 0.354184  |
| Ru1  | 52 | 8 | 8.32154  | -0.32154  |
| Ru2  | 53 | 8 | 8.717556 | -0.717556 |
| Ru3  | 54 | 8 | 8.305555 | -0.305555 |
| Ru4  | 55 | 8 | 8.71485  | -0.71485  |
| Ru5  | 56 | 8 | 8.545444 | -0.545444 |
| Ru6  | 57 | 8 | 8.462906 | -0.462906 |
| Ru7  | 58 | 8 | 8.47978  | -0.47978  |
| Ru8  | 59 | 8 | 8.552004 | -0.552004 |
| Ru9  | 60 | 8 | 8.379533 | -0.379533 |
| Ru10 | 61 | 8 | 8.732465 | -0.732465 |
| Ru11 | 62 | 8 | 8.625287 | -0.625287 |
| Ru12 | 63 | 8 | 8.773466 | -0.773466 |

---



## References

- 1 Z. Chen, W. Gong, J. Wang, S. Hou, G. Yang, C. Zhu, X. Fan, Y. Li, R. Gao and Y. Cui, *Nat. Commun.*, 2023, **14**, 5363.
- 2 G. Kresse and J. Furthmüller, *Comput. Mater. Sci.*, 1996, **6**, 15–50.
- 3 J. P. Perdew, K. Burke and M. Ernzerhof, *Phys. Rev. Lett.*, 1996, **77**, 3865–3868.
- 4 C. Li, S. Mujtaba, J. Quan, L. Xu, X. Ning, P. Chen, Z. An and X. Chen, *Adv. Funct. Mater.*, 2025, **35**, 2501262.
- 5 W. Lou, G. Liu, X. Ma, C. Yang, L. Feng, Y. Liu and X. Gao, *J. Mater. Chem. A*, 2025, **13**, 4356–4366.
- 6 Q. Liu, K. Chen, M. Wang, H. Fan, Z. Yan, X. Du and Y. Chen, *J. Colloid Interface Sci.*, 2024, **663**, 624–631.
- 7 L. Li, J. Qu, L. Zhang, L. Wei, J. Su and L. Guo, *ACS Appl. Mater. Interfaces*, 2024, **16**, 24660–24670.
- 8 G. Afshan, S. Karim, Y. P. Kharwar, T. Aziz, S. Saha, S. Roy and A. Dutta, *Small*, 2025, **21**, 2406431.
- 9 H. Zhang, X. Li, A. Hähnel, V. Naumann, C. Lin, S. Azimi, S. L. Schweizer, A. W. Maijenburg and R. B. Wehrspohn, *Adv. Funct. Mater.*, 2018, **28**, 1706847.
- 10 L. Wu, L. Yu, F. Zhang, B. McElhenny, D. Luo, A. Karim, S. Chen and Z. Ren, *Adv. Funct. Mater.*, 2021, **31**, 2006484.
- 11 H. Huang, S. Zhou, C. Yu, H. Huang, J. Zhao, L. Dai and J. Qiu, *Energy Environ. Sci.*, 2020, **13**, 545–553.
- 12 K. Chang, D. T. Tran, J. Wang, S. Prabhakaran, D. H. Kim, N. H. Kim and J. H. Lee, *Adv. Funct. Mater.*, 2022, **32**, 2113224.
- 13 Y. Ha, T. Zhou, Z. Xu, X. Zhu, X. Chen, Z. Wang and Y. Liu, *Inorg. Chem.*, 2024, acs.inorgchem.4c04302.
- 14 Z. Liu, M. Zha, Q. Wang, G. Hu and L. Feng, *Chem. Commun.*, 2020, **56**, 2352–2355.
- 15 W.-J. Xu, S. U. Rahman, Y.-Y. Wang, J.-Y. Dang, X.-Y. Zhang, W.-L. Li and J. Zhang, *J. Colloid Interface Sci.*, 2025, **690**, 137354.
- 16 X. Zhang, A. Wu, D. Wang, Y. Xie, A. I. Gubanov, G. A. Kostin and C. Tian, *Small*, 2025, 2409703.
- 17 M. Gao, W. Pan, Z. Huang, L. Wang, J. Guo, S. Muhammad, C. Ruan, T. T. Isimjan and X. Yang, *J. Colloid Interface Sci.*, 2025, **683**, 1087–1095.
- 18 L. Mu, J. Ying, Y. Ou, Z. Wang, Y. Liu, N. Zhao, M. Xue, Y. Dai and G. Zhao, *J. Colloid Interface Sci.*, 2025, **688**, 106–117.
- 19 G. Xiong, H. Deng, Y. Chen, Q. Wu, X. Zhou and W. Yao, *ACS Catal.*, 2025, **15**, 13948–13957.
- 20 R. Boppella, P. M. Austeria, G. H. Gu and T. K. Kim, *ACS Catal.*, 2025, **15**, 16981–16991.
- 21 W. Shao, Z. Xing, M. Zhou, R. Yan, T. Ma, B. Yin, Y. Wang, C. Cheng, S. Li and C. Zhao, *Adv. Mater.*, 2025, **37**, 2507080.
